# Supplementary material for: Experimental evaluation of the stabilization of the COT orbitals by 4f orbitals in COT2Ce using a Hubbard model
Source: Royal Society of Chemistry journal article supplement (doi:10.1039/d0dt03897k), 2021-01-01
Supplement: d0dt03897k1.pdf [file d0dt03897k1.pdf]

Supplementary Information for

Experimental evaluation of the stabilization of the COT orbitals by 4f orbitals in COT<sub>2</sub>Ce using a Hubbard model

Wayne W. Lukens<sup>a</sup>, Corwin H. Booth, Marc Walter

**Table S1:**  $|J, m_J\rangle$  states in terms of  $|m_L, m_S\rangle$  states

$$|7/2, 7/2\rangle = |3, 1/2\rangle$$

$$|7/2, 5/2\rangle = \sqrt{1/7} |3, -1/2\rangle + \sqrt{6/7} |2, 1/2\rangle$$

$$|7/2, 3/2\rangle = \sqrt{2/7} |2, -1/2\rangle + \sqrt{5/7} |1, 1/2\rangle$$

$$|7/2, 1/2\rangle = \sqrt{3/7} |1, -1/2\rangle + \sqrt{4/7} |0, 1/2\rangle$$

$$|7/2, -1/2\rangle = \sqrt{3/7} |-1, 1/2\rangle + \sqrt{4/7} |0, -1/2\rangle$$

$$|7/2, -3/2\rangle = \sqrt{2/7} |-2, 1/2\rangle + \sqrt{5/7} |1, -1/2\rangle$$

$$|7/2, -5/2\rangle = \sqrt{1/7} |-3, 1/2\rangle + \sqrt{6/7} |2, -1/2\rangle$$

$$|7/2, -7/2\rangle = |-3, -1/2\rangle$$

$$|5/2, 5/2\rangle = \sqrt{6/7} |3, -1/2\rangle - \sqrt{1/7} |2, 1/2\rangle$$

$$|5/2, 3/2\rangle = \sqrt{5/7} |2, -1/2\rangle - \sqrt{2/7} |1, 1/2\rangle$$

$$|5/2, 1/2\rangle = \sqrt{4/7} |1, -1/2\rangle - \sqrt{3/7} |0, 1/2\rangle$$

$$|5/2, -1/2\rangle = -\sqrt{4/7} |-1, 1/2\rangle + \sqrt{3/7} |0, -1/2\rangle$$

$$|5/2, -3/2\rangle = -\sqrt{5/7} |-2, 1/2\rangle + \sqrt{2/7} |1, -1/2\rangle$$

$$|5/2, -5/2\rangle = -\sqrt{6/7} |-3, 1/2\rangle + \sqrt{1/7} |2, -1/2\rangle$$
